# Supplementary material for: Economic Burden of the Inadequate Management of Allergic Rhinitis and Urticaria in Asian Countries Based on the GA2LEN Model
Source: PubMed Central journal article supplement — Allergy Asthma Immunol Res. 2018 May 8;10(4):370–8. doi: 10.4168/aair.2018.10.4.370 (PMC6021592; doi:10.4168/aair.2018.10.4.370), 2018-05-08
Supplement: aair-10-370-s001.pdf [file aair-10-370-s001.pdf]

## SUPPLEMENTARY MATERIALS

To calculate the socioeconomic costs of AR and urticaria in Asian countries, a literature search of articles published prior to 2016 was carried on PubMed and selected local journals. The following MeSH terms were used: Allergic rhinitis, urticaria, allergens, prevalence, epidemiology, healthcare costs, Asia, Hong Kong, Malaysia, Philippines, Singapore, Thailand, Vietnam. Authors also shared key local publications pertaining to their respective countries. In instances where specific data from literature was unavailable (i.e. daily cost of treatment for various second-generation antihistamines), authors shared data attained from their own practice.

**Supplementary Table 1.** Data sources for calculating number of persons in 15-64-year age group.

| Country     | Source                                                                                                                                                                                                                                                                                                                                                                                                                                                                                                                                                                                                                                                                                          | Additional information                   |
|-------------|-------------------------------------------------------------------------------------------------------------------------------------------------------------------------------------------------------------------------------------------------------------------------------------------------------------------------------------------------------------------------------------------------------------------------------------------------------------------------------------------------------------------------------------------------------------------------------------------------------------------------------------------------------------------------------------------------|------------------------------------------|
| Hong Kong   | Census and Statistics Department. Hong Kong in Figures (Latest Figures) [Internet]. Hong Kong: The Government of Hong Kong Special Administrative Region; [cited 2016 Apr 18]. Available from: <a href="http://www.censtatd.gov.hk/hkstat/hkif/index.jsp">http://www.censtatd.gov.hk/hkstat/hkif/index.jsp</a> .                                                                                                                                                                                                                                                                                                                                                                                | Population data from 2015 were used      |
| Malaysia    | Countrymeters. Malaysia Population 2016   Current Population of Malaysia [Internet]. [cited 2016 Feb 26]. Available from: <a href="http://countrymeters.info/en/Malaysia">http://countrymeters.info/en/Malaysia</a> .<br>Department of Statistics Malaysia OP. Labour Force and Social Statistics [Internet]. Putrajaya (Malaysia): Federal Government Administrative Centre; [cited 2016 Feb 26]. Available from: <a href="https://www.statistics.gov.my/">https://www.statistics.gov.my/</a> .                                                                                                                                                                                                | Population data from 2015-2016 were used |
| Philippines | Philippine Statistics Authority. Statistical Tables on Labor Force Survey (LFS): October 2015 [Internet]. Quezon City (Philippines): Government of the Republic of Philippines; [cited 2016 Jul 21]. Available from URL: <a href="https://psa.gov.ph/content/statistical-tables-labor-force-survey-lfs-october-2015">https://psa.gov.ph/content/statistical-tables-labor-force-survey-lfs-october-2015</a> .                                                                                                                                                                                                                                                                                    | Population data from 2015 were used      |
| Singapore   | Department of Statistics Singapore. Statistics Singapore - Latest Data [Internet]. Singapore: Government of Singapore; [cited 2016 Feb 26]. Available from: <a href="http://www.singstat.gov.sg/statistics/latest-data#14">http://www.singstat.gov.sg/statistics/latest-data#14</a> .                                                                                                                                                                                                                                                                                                                                                                                                           | Population data from 2015 were used      |
| Thailand    | Official Statistics Registration Systems. Demographic and home - Population age [Internet]. Pathum Thani (Thailand): Registrar Administration Department; [cited 2016 Feb 26]. Available from: <a href="http://stat.dopa.go.th/stat/statnew/upstat_age.php">http://stat.dopa.go.th/stat/statnew/upstat_age.php</a><br>National Statistical Office MolaCT. The Labour Force Survey 2016 [Internet]. Bangkok (Thailand): Ministry of Information and Communication Technology; [cited 2016 Apr 18]. Available from: <a href="http://service.nso.go.th/nso/web/statseries/tables/00000_Whole_Kingdom/2.1.xls">http://service.nso.go.th/nso/web/statseries/tables/00000_Whole_Kingdom/2.1.xls</a> . | Population data from 2015 were used      |
| Vietnam     | United Nations DoEaSAPD. World Population Prospects: The 2015 Revision [Internet]. [New York (NY): United Nations]; 2015 [cited 2016 Apr 18]. Available from: <a href="https://esa.un.org/unpd/wpp/Download/Standard/Population/">https://esa.un.org/unpd/wpp/Download/Standard/Population/</a> .<br>General Statistics Office of Vietnam. Annual employed population at 15 years of age and above by age group 2014 [Internet]. Hanoi (Vietnam): Statistical Documentation and Service Centre; [cited 2016 Jul 1]. Available from: <a href="http://www.gso.gov.vn/default_en.aspx?tabid=774">http://www.gso.gov.vn/default_en.aspx?tabid=774</a> .                                             | Population data from 2015 were used      |
