# Supplementary material for: Economic Burden of the Inadequate Management of Allergic Rhinitis and Urticaria in Asian Countries Based on the GA2LEN Model
Source: PubMed Central journal article supplement — Allergy Asthma Immunol Res. 2018 May 8;10(4):370–8. doi: 10.4168/aair.2018.10.4.370 (PMC6021592; doi:10.4168/aair.2018.10.4.370), 2018-05-08
Supplement: aair-10-370-s004.pdf [file aair-10-370-s004.pdf]

**Supplementary Table 4.** Data sources for calculating cost of treatments in Asia

| Country     | Source                                                                                                                                                                                                                                                                                                               | Study summary                                                                                                                                                                                                                                                                                                                                                                                                                                                                                 |
|-------------|----------------------------------------------------------------------------------------------------------------------------------------------------------------------------------------------------------------------------------------------------------------------------------------------------------------------|-----------------------------------------------------------------------------------------------------------------------------------------------------------------------------------------------------------------------------------------------------------------------------------------------------------------------------------------------------------------------------------------------------------------------------------------------------------------------------------------------|
| Hong Kong   | Lai CKW, Kim Y-Y, Kuo S-H, Spencer M, Williams AE. Cost of asthma in the Asia-Pacific region. <i>European Respiratory Review</i> . 2006;15:10-16.                                                                                                                                                                    | A total of 3,207 participants from eight Asia-Pacific countries (China, Hong Kong, Korea, Malaysia, Philippines, Singapore, Taiwan and Vietnam) were recruited to the study, which analysed the per-patient costs of asthma in the region. 45-60 minutes face-to-face interviews were conducted based on a modified American Thoracic Society questionnaire. The annual total per-patient costs ranged between USD 184-1,189. The annual direct cost per patient was USD 1,010 for Hong Kong. |
|             | Data from clinical practice (data provided by Dr Alson Wong from his private clinic in Hong Kong, based on experience in clinical practice).                                                                                                                                                                         | Daily cost of treatment for various second-generation antihistamines in Hong Kong (Supplementary Table 5).                                                                                                                                                                                                                                                                                                                                                                                    |
| Malaysia    | Lai CKW, Kim Y-Y, Kuo S-H, Spencer M, Williams AE. Cost of asthma in the Asia-Pacific region. <i>European Respiratory Review</i> . 2006;15:10-16.                                                                                                                                                                    | A total of 3,207 participants from eight Asia-Pacific countries (China, Hong Kong, Korea, Malaysia, Philippines, Singapore, Taiwan and Vietnam) were recruited to the study, which analysed the per-patient costs of asthma in the region. 45-60 minutes face-to-face interviews were conducted based on a modified American Thoracic Society questionnaire. The annual total per-patient costs ranged between USD 184-1,189. The annual direct cost per patient was USD 108 for Malaysia.    |
|             | Data from private clinics (data provided by Dr Henry Foong from Foong Skin Specialist Clinic, Ipoh, Malaysia, based on experience in clinical practice).                                                                                                                                                             | Daily cost of treatment for various second-generation antihistamines in Malaysia (Supplementary Table 5).                                                                                                                                                                                                                                                                                                                                                                                     |
|             | Consumer Price Guide [Internet]. Malaysia: Ministry of Health Malaysia; [cited 2016 Apr 18]. Available from: <a href="http://www.pharmacy.gov.my/v2/en/apps/drug-price">http://www.pharmacy.gov.my/v2/en/apps/drug-price</a> .                                                                                       | Daily cost of treatment for various second-generation antihistamines in Malaysia (Supplementary Table 5).                                                                                                                                                                                                                                                                                                                                                                                     |
| Philippines | Lai CKW, Kim Y-Y, Kuo S-H, Spencer M, Williams AE. Cost of asthma in the Asia-Pacific region. <i>European Respiratory Review</i> . 2006;15:10-16. SRP Price Mercury Drug November 2015 survey [Internet].                                                                                                            | A total of 3,207 participants from eight Asia-Pacific countries (China, Hong Kong, Korea, Malaysia, Philippines, Singapore, Taiwan and Vietnam) were recruited to the study, which analysed the per-patient costs of asthma in the region. 45-60 minutes face-to-face interviews were conducted based on a modified American Thoracic Society questionnaire. The annual total per-patient costs ranged between USD 184-1,189. The annual direct cost per patient was USD 212 for Philippines. |
|             | Philippines: Mercury Drug; [cited 2016 Apr 18]. Data on Mercury Drug Price from August 2015–June 2017 retrieved by Dr Marysia Tiongco Recto of the University of the Philippines-Philippine General Hospital, Manila, Philippines.                                                                                   | Daily cost of treatment for various second-generation antihistamines in the Philippines (Supplementary Table 5).                                                                                                                                                                                                                                                                                                                                                                              |
|             | Data from clinical practice (data provided by Dr Marysia Tiongco Recto from University of the Philippines-Philippine General Hospital, Manila, Philippines and from Dr Ma. Teresita Gabriel from the Research Institute for Tropical Medicine, Manila, Philippines, based on their experience in clinical practice). |                                                                                                                                                                                                                                                                                                                                                                                                                                                                                               |
| Singapore   | Lai CKW, Kim Y-Y, Kuo S-H, Spencer M, Williams AE. Cost of asthma in the Asia-Pacific region. <i>European Respiratory Review</i> . 2006;15:10-16.                                                                                                                                                                    | A total of 3,207 participants from eight Asia-Pacific countries (China, Hong Kong, Korea, Malaysia, Philippines, Singapore, Taiwan and Vietnam) were recruited to the study, which analysed the per-patient costs of asthma in the region. 45-60 minutes face-to-face interviews were conducted based on a modified American Thoracic Society questionnaire. The annual total per-patient costs ranged between USD 184-1,189. The annual direct cost per patient was USD 211 for Singapore.   |
|             | Data from clinical practice (data provided by Dr Derrick Chen-Wee Aw from National University Hospital, Singapore and from Dr Jern Lin Leong from ASCENT Ear Nose Throat Specialist Group, Singapore, based on their experience in clinical practice).                                                               | Daily cost of treatment for various second-generation antihistamines in Singapore (Supplementary Table 5).                                                                                                                                                                                                                                                                                                                                                                                    |
| Thailand    | Data from clinical practice (data provided by Dr Kanokvalai Kulthanan from the Faculty of Medicine Siriraj Hospital, Mahidol University, Bangkok, Thailand and from Dr Supinda Chusakul from the Faculty of Medicine, Chulalongkorn University, Bangkok, Thailand, based on their experience in clinical practice).  | Daily cost of treatment for various second-generation antihistamines in Thailand (Supplementary Table 5).                                                                                                                                                                                                                                                                                                                                                                                     |

*(Continued to the next page)*

**Supplementary Table 4.** Continued

| Country | Source                                                                                                                                                                    | Study summary                                                                                                                                                                                                                                                                                                                                                                                                                                                                             |
|---------|---------------------------------------------------------------------------------------------------------------------------------------------------------------------------|-------------------------------------------------------------------------------------------------------------------------------------------------------------------------------------------------------------------------------------------------------------------------------------------------------------------------------------------------------------------------------------------------------------------------------------------------------------------------------------------|
| Vietnam | Lai CKW, Kim Y-Y, Kuo S-H, Spencer M, Williams AE. Cost of asthma in the Asia-Pacific region. <i>European Respiratory Review</i> . 2006;15:10-16.                         | A total of 3,207 participants from eight Asia-Pacific countries (China, Hong Kong, Korea, Malaysia, Philippines, Singapore, Taiwan and Vietnam) were recruited to the study, which analysed the per-patient costs of asthma in the region. 45-60 minutes face-to-face interviews were conducted based on a modified American Thoracic Society questionnaire. The annual total per-patient costs ranged between USD 184-1,189. The annual direct cost per patient was USD 141 for Vietnam. |
|         | Data from clinical practice (data provided by Dr Vo Thanh Quang from National Hospital of Otorhinolaryngology, Hanoi, Vietnam, based on experience in clinical practice). | Daily cost of treatment for various second-generation antihistamines in the Vietnam (Supplementary Table 5)                                                                                                                                                                                                                                                                                                                                                                               |
