# Supplementary material for: Economic Burden of the Inadequate Management of Allergic Rhinitis and Urticaria in Asian Countries Based on the GA2LEN Model
Source: PubMed Central journal article supplement — Allergy Asthma Immunol Res. 2018 May 8;10(4):370–8. doi: 10.4168/aair.2018.10.4.370 (PMC6021592; doi:10.4168/aair.2018.10.4.370), 2018-05-08
Supplement: aair-10-370-s005.pdf [file aair-10-370-s005.pdf]

**Supplementary Table 5.** Daily cost of treatment for various second-generation antihistamines (in USD) and their recommended duration of treatment

| Antihistamine (commonly prescribed dose) | Hong Kong         |           | Malaysia* |          | Philippines |            | Singapore |          | Thailand <sup>†‡</sup> |              | Vietnam           |           |
|------------------------------------------|-------------------|-----------|-----------|----------|-------------|------------|-----------|----------|------------------------|--------------|-------------------|-----------|
|                                          | Cost              | Duration  | Cost      | Duration | Cost        | Duration   | Cost      | Duration | Cost                   | Duration     | Cost              | Duration  |
| Bilastine (20 mg; OD)                    | 0.93              | 7-14 days | 0.42      | 14 days  | 0.57        | 7-14 days  | 0.45      | 90 days  | 0.45                   | 8.5-390 days | 0.50              | 7-14 days |
| Cetirizine (10 mg; OD)                   | 0.19 <sup>‡</sup> | 7-14 days | 0.34      | 14 days  | 0.79        | 7-14 days  | 1.41      | 90 days  | 0.32                   | 8.5-390 days | 0.33 <sup>‡</sup> | 7-14 days |
| Desloratadine (5 mg; OD)                 |                   |           | 0.73      | 14 days  |             |            |           |          | 0.62                   | 8.5-390 days |                   |           |
| Ebastine (information not available)     |                   |           |           |          | 0.58        | 7-14 days  |           |          | -                      |              | 0.22 <sup>‡</sup> | 7-14 days |
| Fexofenadine (180 mg; 1-4 tablets daily) | 0.39 <sup>‡</sup> | 7-14 days | 0.39      | 14 days  | 1.51        | 7-14 days  | 0.38      | 90 days  | 0.49                   | 8.5-390 days | 0.10 <sup>‡</sup> | 7-14 days |
| Ketotifen (1 mg; 1-2 tablets daily)      | 0.06 <sup>‡</sup> | 7-14 days | -         | -        | 0.72        | 14-28 days | 1.29      | 90 days  | 0.03                   |              | 0.14              | 7-14 days |
| Levocetirizine (5 mg; 1-4 tablets daily) |                   |           | 0.42      |          | 0.57        | 7-14 days  | 0.43      | 90 days  | 0.54                   | 8.5-390 days |                   |           |
| Loratadine (10 mg; OD)                   | 0.19 <sup>‡</sup> | 7-14 days | 0.39      | 14 days  | 0.73        | 7-14 days  | 1.29      | 90 days  | 0.37                   | 8.5-390 days | 0.04 <sup>‡</sup> | 7-14 days |
| Rupatadine (10 mg; 1-2 tablets daily)    |                   |           | -         |          | 0.64        | 7-14 days  |           |          | 1.16                   | 8.5-390 days | 0.31              | 7-14 days |

\*Prices are based on the Malaysian private healthcare sector only, where no reimbursement is available; <sup>†</sup>Prices are indicative of average costs of innovator drugs (does not include locally produced drugs); <sup>‡</sup>Reimbursement available. OD, once daily.
