# Supplementary material for: Economic Burden of the Inadequate Management of Allergic Rhinitis and Urticaria in Asian Countries Based on the GA2LEN Model
Source: PubMed Central journal article supplement — Allergy Asthma Immunol Res. 2018 May 8;10(4):370–8. doi: 10.4168/aair.2018.10.4.370 (PMC6021592; doi:10.4168/aair.2018.10.4.370), 2018-05-08
Supplement: aair-10-370-s006.pdf [file aair-10-370-s006.pdf]

**Supplementary Table 6.** Daily cost of treatment for various nasal corticosteroid sprays (in USD) and their recommended duration of treatment

| Nasal corticosteroid spray<br>(commonly prescribed dose) | Hong Kong* |            | Malaysia <sup>†</sup> |             | Philippines |            | Singapore <sup>‡</sup> |          | Thailand |            | Vietnam <sup>†</sup> |          |
|----------------------------------------------------------|------------|------------|-----------------------|-------------|-------------|------------|------------------------|----------|----------|------------|----------------------|----------|
|                                                          | Cost       | Duration   | Cost                  | Duration    | Cost        | Duration   | Cost                   | Duration | Cost     | Duration   | Cost                 | Duration |
| Mometasone furoate (50 mcg/spray; 200 mcg/day)           | 0.28       | 15-35 days | 0.41                  | 90-120 days | 0.53        | 15-30 days | 1.17                   | 15 days  | 0.35     | 30-90 days | 0.29                 | 14 days  |
| Fluticasone furoate (27.5 mcg/spray; 110 mcg/day)        | 0.33       | 30 days    | 0.41                  | 90-120 days | 0.7         | 15-30 days | 0.92                   | 15 days  | 0.14     | 30-90 days | 0.26                 | 14 days  |
| Triamcinolone acetonide (55 mcg/spray; 220 mcg/day)      |            |            | 0.41                  | 90-120 days |             |            | 0.49                   | 15 days  | 0.14     | 30-90 days | 0.17                 | 28 days  |
| Fluticasone propionate (50 mcg/spray; 200 mcg/day)       |            |            | 0.41                  | 90-120 days | 0.42        | 15-30 days |                        |          | 0.16     | 30-90 days |                      |          |
| Ciclesonide (50 mcg/spray; 200 mcg/day)                  |            |            | 0.41                  | 90-120 days | 0.49        | 15-30 days |                        |          | 0.37     | 30-90 days |                      |          |
| Budesonide (32 mcg/spray; 64 mcg/day)                    |            |            | 0.41                  | 90-120 days |             |            |                        |          | 0.14     | 30-90 days |                      |          |

\* As Hong Kong is a self-dispensing market, the cost to patient is dependent on the doctor's preference. The quoted prices are the cost per unit to doctors; <sup>†</sup>Only cumulative data on the Malaysian market was available. The prices quoted are the average daily cost of both innovator and locally produced nasal corticosteroid sprays; <sup>‡</sup>Prices are indicative of average costs of innovator drugs (does not include locally produced drugs).
